1 **Title:** A behavioral logic underlying aggression in an African cichlid fish

2

3 **Short title:** Aggression in a cichlid

4

5 **Authors:** Beau A. Alward<sup>1,2,3\*</sup>, Phillip H. Cathers<sup>3</sup>, Danielle M. Blakkan<sup>3</sup>, Russell D. Fernald<sup>3</sup>

6

7 **Affiliations:** <sup>1</sup>University of Houston, Department of Psychology; <sup>2</sup>University of Houston,  
8 Department of Biology and Biochemistry; <sup>3</sup>Stanford University, Department of Biology

9

10 **\*Corresponding author:** [balward@uh.edu](mailto:balward@uh.edu)

11

12 **Competing interest:** We have no competing interests.

13

14 **Author's contributions:** Conceptualization, B.A.A., P.H.C., D.M.B., R.D.F.; Methodology,  
15 B.A.A., P.H.C., D.M.B.; Investigation, B.A.A., P.H.C.; Writing – Original Draft, B.A.A.; Writing –  
16 Review & Editing, B.A.A., P.H.C., D.M.B., R.D.F.; Supervision, B.A.A., R.D.F.

17

18

19 **Abstract**

20

21 Social rank in a hierarchy determines which individuals have access to important resources

22

23 such as food, shelter, and mates. In the African cichlid fish *Astatotilapia burtoni*, rank is under

24

25 social control, such that larger males are more likely than smaller males to be dominant in rank.

26

27 Although it is well known that the relative size of *A. burtoni* males is critical in controlling social

28

29 rank, the specific behavioral strategies underlying responses to males of different sizes are not

30

31 well understood. In this research, our goal was to characterize these responses by performing

32

33 resident-intruder assays, in which aggressive behaviors were measured in territorial males in

34

35 response to the introduction of unfamiliar males that differed in relative standard length (SL). We

36

37 found that the relative SL of intruders played an important role in determining behavioral

38

39 performance. Resident males exposed to larger (>5% larger in SL) or matched (between 0 and

40

41 5% larger or smaller in SL) intruder males performed more lateral displays, a type of non-

42

43 physical aggression, compared to resident males exposed to smaller (>5% smaller in SL)

44

45 intruder males. However, physical aggression, such as chases and bites, did not differ as a

46

47 function of relative SL. Our results suggest that *A. burtoni* males amplify non-physical

48

49 aggression to settle territorial disputes in response to differences in relative SL that were not

50

51 previously considered to be behaviorally relevant.

37 **Keywords:** Aggression, territorial, resident-intruder, social behavior, cichlid

38

39 **Highlights**

40

- 41 • Relative size determines social rank in the African cichlid *Astatotilapia burtoni*
- 42 • Resident male *A. burtoni* respond differently to small size differences in intruder males
- 43 • Residents perform more non-physical aggression against larger intruders
- 44 • Residents do not alter physical aggression as a function of differently sized intruders
- 45 • Distinct behavioral strategies are used against different intruders

46

47 **Introduction**

48

49 Intraspecific aggression is widespread among social animals (van Staaden, Searcy, &  
50 Hanlon, 2011). Aggressive behavior, either through physical attacks or non-physical signaling, is  
51 used to resolve conflicts related to access to resources such as food, shelter, territory, and  
52 mates. Extraordinary diversity exists in how different species express aggression and the rules  
53 that govern aggressive interactions. However, one rule seems to apply across species: physical  
54 or injurious behaviors are considered to be escalatory, occurring primarily in response to  
55 conflicts that are difficult to resolve (Holekamp & Strauss, 2016; Maynard Smith & Harper, 1988;  
56 van Staaden et al., 2011). The degree of conflict has been formally defined in terms of  
57 differences in resource holding potential (RHP). RHP can take the form of different levels of  
58 fighting ability as measured by body or weapon size. When large asymmetries in RHP exist  
59 among animals, aggressive interactions do not escalate from non-physical to physical; however,  
60 when asymmetries in RHP among animals are smaller, aggressive interactions are more likely  
61 to escalate, involving more physical and injurious forms of aggression.

62

63 Evolution has shaped social dynamics across species to resolve aggressive interactions  
64 with as little physical fighting as possible, as this ensures individual and species survival  
65 (Holekamp & Strauss, 2016; Maynard Smith & Harper, 1988; van Staaden et al., 2011). This is  
66 abundantly clear in social animals that exist in a hierarchy, where rank determines which  
67 individuals possess a territory and the behaviors they perform. This is the case for the African  
68 cichlid fish *Astatotilapia burtoni*, where males stratify along a dominance hierarchy and exist as  
69 either non-dominant or dominant (Fernald, 2012). Dominant males possess a territory which  
70 they defend through aggressive interactions and in which they mate with females, while non-  
71 dominant males do not perform these behaviors. Dominant males also possess larger testes  
72 and brighter body coloration compared to non-dominant males. Social hierarchies in *A. burtoni*  
73 remain in flux, however, as non-dominant males constantly survey the environment, searching  
74 for a social opportunity to ascend in social rank to dominance. Social opportunity for a non-  
75 dominant *A. burtoni* male typically occurs when a larger male is absent from the environment,  
76 which a given smaller non-dominant male perceives as an opportunity to ascend to dominant  
77 rank. Within minutes of the opportunity, the non-dominant male increases aggressive and  
78 reproductive behavior in an attempt to establish a territory. Dominant males who encounter a  
79 larger dominant male in their environment will begin to descend in social rank by reducing  
80 aggressive and reproductive behavior (Maruska, Becker, Neboori, & Fernald, 2013).

81  
82 Size-induced social control of social status in *A. burtoni* has been shown in several  
83 studies. The reliable occurrence of this phenomenon makes size an excellent tool for  
84 controlling social environments in the laboratory, with the goal of generating fish with a given  
85 social status and studying the associated physiological underpinnings (for examples, see  
86 Alward, Hilliard, York, & Fernald, 2019; Maruska, Becker, Neboori, & Fernald, 2013; Maruska &  
87 Fernald, 2010). Although it has been shown repeatedly that size influences social status in male  
88 *A. burtoni*, a precise understanding of the relationship between size and behavior has not been

89 established. For instance, while size is something that modifies social decisions in male *A.*  
90 *burtoni*, it is unclear what size difference males actually perceive as different and how they  
91 modify their behavior accordingly. Previous work has defined male *A. burtoni* as “matched” in  
92 size within a large range of standard length (e.g., 0-10% larger or smaller in standard length  
93 (SL=measured from the most anterior portion of the mouth to the most anterior portion of the  
94 caudal fin); see Alcazar, Hilliard, Becker, Bernaba, & Fernald, 2014; Desjardins & Fernald,  
95 2010)). However, recent work suggests that very small size differences between male *A. burtoni*  
96 can affect social interactions. For example, Alcazar et al ( 2014) found that males that were 2.1-  
97 4.9% larger in SL than their competitor consistently won during a contest, suggesting that size  
98 differences previously regarded as “matched” may actually be behaviorally relevant. However,  
99 this study was focused on which fish won each contest and not on the specific behavioral  
100 strategies underlying responses to differently sized males.

101

102 Characterizing the specific behavioral patterns in *A. burtoni* that occur in response to  
103 differently sized males may yield insight into the capacity of *A. burtoni* to discern different levels  
104 of social opportunities, which would allow for a deeper understanding of the cognitive abilities  
105 required to successfully navigate a social hierarchy. In the present study we characterized  
106 behavioral responses in male *A. burtoni* as a function of differently sized male competitors  
107 during resident-intruder assays, in which a dominant male with a territory (i.e., the resident) was  
108 exposed to an unfamiliar, non-dominant male intruder that differed in relative standard length  
109 (SL). (illustrated in Fig. 1). The results of this study could shed light on the rules of engagement  
110 during social interactions in male *A. burtoni*.

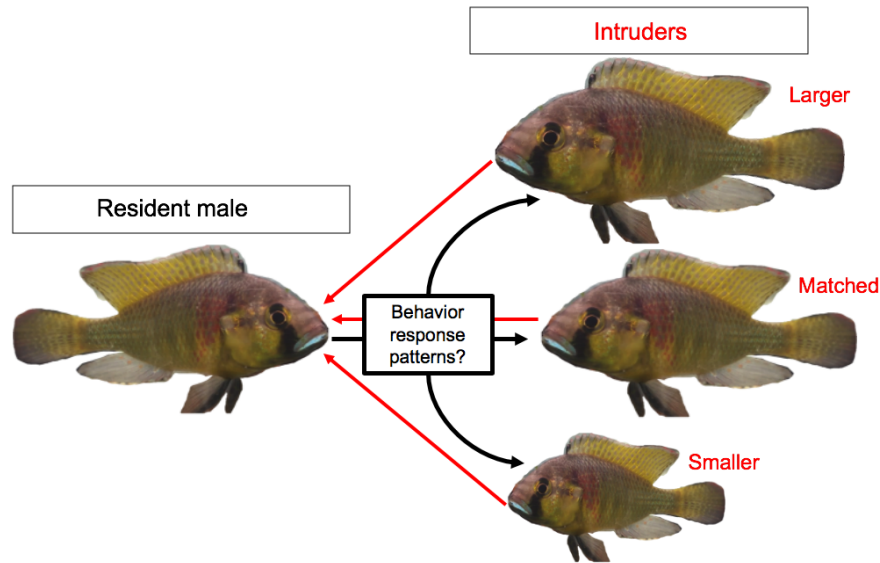

111

112 **Figure 1. The behavioral patterns in male *Astatotilapia burtoni* underlying responses to**  
113 **differently sized males have not been characterized.** Male *A. burtoni* change their social  
114 status depending on the social environment. Large males socially suppress smaller males and  
115 large males are more likely to be dominant. The specific behaviors males perform in response  
116 to differences in relative size, however, have not been determined. We asked during a resident-  
117 intruder assay what behavior patterns resident males use when presented with male intruders  
118 that were smaller, larger, or matched in size.

119

## 120 **Methods**

121

### 122 *Ethical Note*

123

124 The protocols and procedures used here were approved by the Stanford University  
125 Administrative Panel on Laboratory Animal Care (protocol number: APLAC\_9882) and followed  
126 the ASAB/ABS Guidelines for the use of animals in research. We were able to monitor the  
127 behaviours of all fish throughout each day of the study (see below). Throughout the whole  
128 assay, each tank was monitored in real time through a Wi-Fi-enabled camcorder remotely  
129 connected to a tablet (iPad). Fish in all other tanks were monitored three times daily by visual  
130 inspection, to ensure they experienced no physical harm. No fish were physically harmed at any  
131 point during the assay.

132 *Animals used*

133

134 Fish were bred and used at Stanford University from a colony derived from Lake  
135 Tanganyika in accordance with AAALAC standards.

136

137 *General approach*

138

139 To assess behavior as a function of SL, we conducted resident-intruder assays. We took  
140 several steps to control for social experience and age of both the resident and intruder, since  
141 these factors have been found to influence behavior in *A. burtoni* (Alcazar et al., 2014;  
142 Solomon-Lane & Hofmann, 2019). In these assays, the resident had a dominant social status  
143 and an established territory, while the intruder had a non-dominant social status. To control for  
144 previous social experience, the resident and intruder were unrelated and had had no visual,  
145 physical, or chemical interaction at any point prior to the assay. Another step we took to control  
146 for social experience was to socially suppress all males before they were given the social  
147 opportunity to ascend to dominance and were provided a territory. We also physically isolated  
148 socially ascending fish from other fish, to further control for the role of social experience on  
149 behavioral responses to the intruder. All intruders were socially suppressed in a tank with fish  
150 that were unrelated to the resident. Finally, all resident-intruder pairs were age-matched, to  
151 control for effects of age on behavior (Alcazar et al., 2014).

152 *Assay set up*

153 *Social suppression*

154 Two 121-liter social suppression tanks (see Fig. 2a for illustrated example) were each  
155 filled with 20 related, small suppressed males, as well as 3 large, unrelated dominant males and

156 3 females. The two tanks contained broods of the same age from different parents. Fish from  
157 the two tanks could not interact visually, physically, or chemically with those in the other tank.  
158 Smaller suppressed males were housed in these conditions for at least 45 days before being  
159 transferred to a dominance inducing tank (see below).

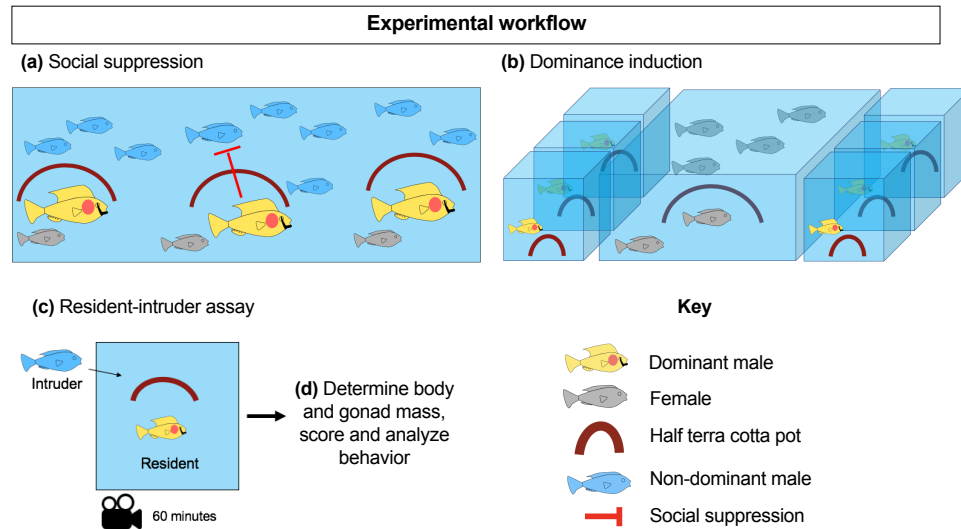

160

161 **Figure 2. Experimental workflow to probe behavioral strategies in male *Astatotilapia***  
162 ***burtoni*.** (a) Males were socially suppressed to non-dominant social status using social  
163 suppression tanks. (b) After social suppression, males were placed individually into dominance  
164 inducing tanks where they possessed and could interact visually with males and females. (c)  
165 Once males reach social dominance, they are transferred to a tank where they establish a  
166 territory as a resident and then exposed to a male intruder. (d) After the assay, male residents  
167 are weighed for body and gonad mass and behavior videos are scored and analyzed.

168

### 169 *Dominance inducing tank setup*

170 Thirty-liter dominance inducing tanks (see Fig. 2b for illustrated example) were set up for  
171 the isolation of previously suppressed males to allow for controlled social ascent to dominance.  
172 Each tank contained a shelter (half terra cotta pot) and faced a 121-liter tank filled with 10  
173 unrelated females with which the male could interact visually but not physically or chemically.  
174 Beside each tank was another isolated male in a dominance-inducing tank with which they

175 could interact visually but not physically or chemically. Males were transferred from the  
176 suppression tank and isolated in a dominance-inducing tank for 2-4 weeks before entering the  
177 assay tank.

#### 178 *Resident-intruder assay*

179 A resident-intruder assay tank (see Fig. 2c for illustrated example) consisted of one 30-  
180 liter tank, with a half terra cotta pot (Fig. 2c). A male was removed from a dominance-inducing  
181 tank, its SL was measured, and immediately placed in an 30-liter tank containing gravel and a  
182 half terra cotta pot simulating a spawning site. The male was given 48 hours to acclimate and  
183 establish a territory (Alward et al., 2019).

184 After the 48-hour acclimation period, an intruder male was removed from its social  
185 suppression tank, its SL was measured, and then it was introduced to the resident-intruder  
186 assay tank. Video recording began as soon as the intruder was introduced. Behavioral  
187 interactions were also monitored remotely in real time (iPad). Immediately after observation of  
188 the first aggressive behavior by the intruder or resident, recording continued for 60 min more  
189 and then the assay was stopped.

#### 190 *Dissections*

191 Immediately following the completion of the resident-intruder assay, the resident male  
192 was removed, weighed, and euthanized via rapid cervical transection (see Fig. 2d). An incision  
193 was made anterior to the vent to the caudal fin and the gonads were removed and weighed.

#### 194 *Scoring behavior*

195 Based on previous work, multiple types of behavior were quantified ( Fernald & Hirata,  
196 1977; see Fig. 3 for illustrated examples of behaviors): fleeing from male; physical aggression



197 (chase male and bite male); non-physical aggression (lateral display and flexing); and pot entry,  
198 a territorial behavior. Fleeting was defined as a rapid swim retreating from an approaching fish.  
199 Chase was defined as a rapid swim directed towards a fish. Biting was defined as the male  
200 lunging a short distance towards a fish and biting it on its side, then floating backwards a short  
201 distance. Lateral displays were defined as aggressive displays classified as presentations of the  
202 side of the body to another fish with erect fins, flared opercula, and trembling of the body.  
203 Flexes were defined as presentations of the side of the body with erect fins while the fish was  
204 immobile. Pot entry was defined as as any time a male entered the half terra cotta pot. Videos  
205 were scored in Scorevideo (Matlab). The results of scoring videos were saved into log files that  
206 were subjected to a variety of analyses using custom R software.

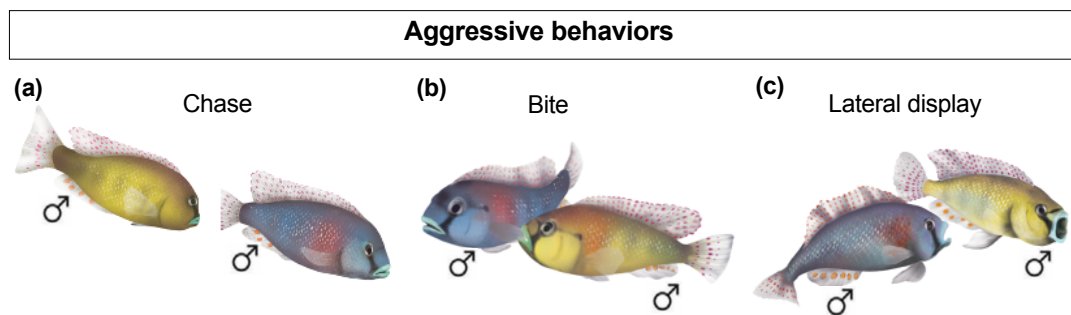

207

208 **Figure 3. Illustration of aggressive behaviors.** We quantified multiple aggressive behaviors  
209 performed during resident-intruder assays, including (a) chases, (b) bites, and (c) lateral  
210 displays directed towards males.

211

212 *Measuring the effects of size differences: group-level and continuous analyses*

213 Previous work in *A. burtoni* and other cichlids suggests that a size difference between 0  
214 and 5% is considered “matched” in size (Alcazar et al., 2014; Reddon et al., 2011; Taborsky,  
215 1984, 1985). Therefore, to explore the behavioral strategies used as a function of relative SL  
216 (intruder SL/resident SL), we used three groups for our resident-intruder assays: Smaller,

217 Matched, and Larger. The “Smaller” group contained residents that were exposed to intruders  
218 5% or more larger in SL; the “Matched” group included residents that were within  $\pm 5\%$  of the  
219 size of the intruder; and the “Larger” group included residents that were exposed to intruders  
220 5% or more smaller in SL. We also assessed the effects of relative SL as a continuous variable  
221 on behavior using correlational analyses.

## 222 *Statistical analysis*

223

224 All statistical tests were performed in Prism 8.0. We used Kruskal-Wallis ANOVAs  
225 followed by Dunn's post-hoc tests for comparisons of physiological and behavioral measures  
226 across groups. When comparing only two groups, we used Mann-Whitney tests. Raster plots  
227 were generated using custom software packages in R (available at <https://github.com/FernaldLab>). Correlational analyses were conducted using Pearson's  $r$ . Effects were  
228 considered significant at  $p \leq 0.05$ .

229

## 230 **RESULTS**

231

### 232 *Qualitative analysis of behavior as a function of relative SL*

233

234 We first visualized behavioral output for all fish in raster plots (Fig. 4). These plots  
235 showed that regardless of relative SL, residents attacked intruders at similar rates. However,  
236 fish from both the Matched (Actual SL difference range=intruder 0 to 4% larger than resident)  
237 and the Smaller group (Actual SL difference range=intruder 5 to 10% larger than the resident)  
238 performed more lateral displays than the Larger group (Actual SL difference range=intruder 5 to  
239 23% smaller than the resident), suggesting that as intruder SL increases relative to the resident,  
240 residents perform more non-physical acts of aggression. Finally, most intruders performed zero  
241

242 aggressive behaviors towards the resident (see Fig. 5; results not shown in raster plots because  
243 it occurred at such low rates and only in a few fish; see below), indicating that the resident fish  
244 all maintained dominance throughout the challenge (or “won”).

245

246

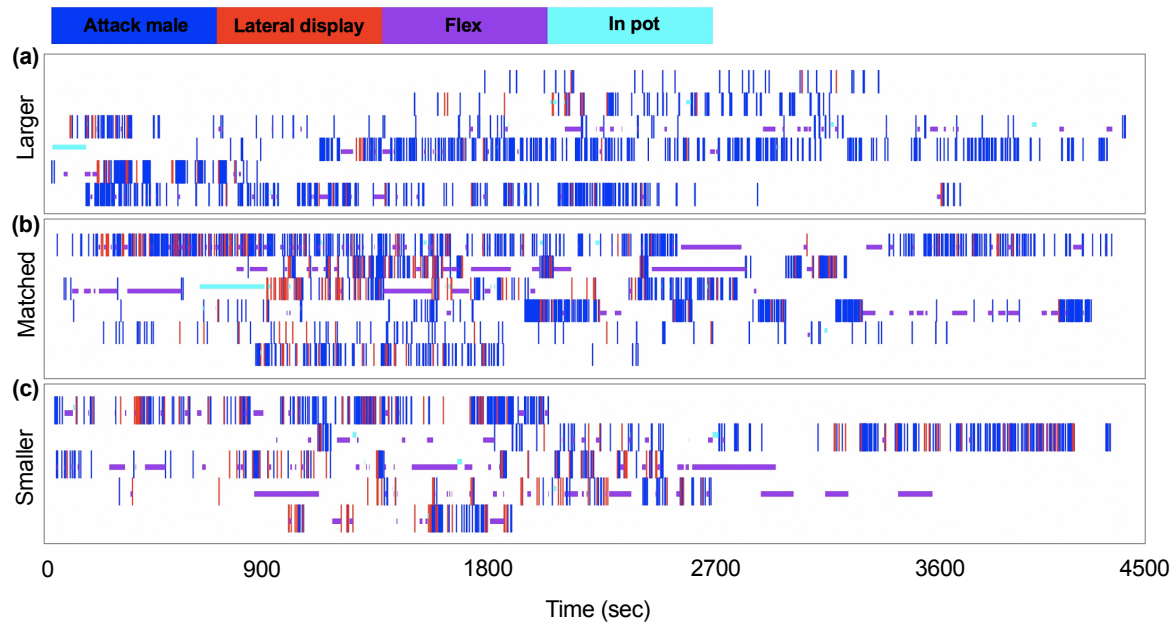

247

248 **Figure 4. Qualitative visualization of behavior.** Raster plots showing behavior from individual  
249 fish from each the (a) Larger, (b) Matched, or (c) Smaller group. Each colored line represents a  
250 particular type of behavior. The x-axis represents time. “Flex” and “In pot” are represented here  
251 as durational behaviors; once the bar denoting either behavior is over the fish has stopped that  
252 behavior.

253

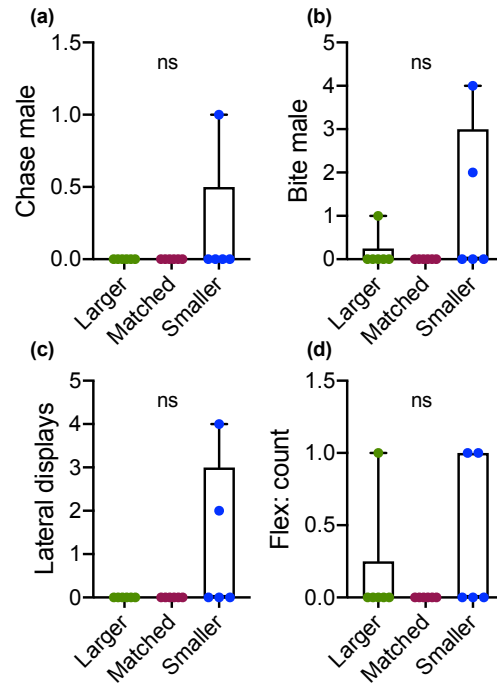

254

255 **Figure 5. Effects of group on aggressive behavior in intruder males.** (a) There were no  
256 effects of group on various intruder behaviors, including (a) chase male, (b) bite male, (c) lateral  
257 displays, and (d) flexing. Each circle represents an individual fish. Top and bottom whiskers  
258 represent maximum and minimum, respectively; top and lower boxes represent third and first  
259 quartiles, respectively; line within box represents the median.  
260

261 *Correlational analyses reveal different features of resident aggression scale with relative SL*

262

263 We next ran correlational analyses to assess the relationship between relative SL and  
264 behavior. These analyses showed that different aspects of aggression in the resident were  
265 altered by relative SL. For instance, the resident performed more lateral displays as relative SL  
266 increased ( $r=0.63$ ,  $N=17$ ,  $P=0.007$ ) (Fig. 6a). Additionally, once relative SL reached the Matched  
267 range, residents exhibited a stark increase in the number of lateral displays they performed that  
268 continued into the larger range. The resident also flexed for longer as relative SL increased  
269 ( $r=0.53$ ,  $N=17$ ,  $P=0.02$ ) (Fig. 6b). When relating the proportion of each behavior performed to  
270 the relative SL of the intruder, we found a significant positive relationship between lateral display  
271 proportion and relative SL ( $r=0.62$ ,  $N=17$ ,  $P=0.008$ ) (Fig. 6c). We also found significant

272 relationships between the latency for the resident to perform behavior the relative SL of the  
273 intruder. Specifically, residents took longer to perform the first chase at the intruder as the  
274 relative SL of the intruder increased ( $r=-0.49$ ,  $N=17$ ,  $P=0.04$ ) (Fig. 6d). Residents also took  
275 longer to perform lateral displays ( $r=-0.56$ ,  $N=17$ ,  $P=0.02$ ) (Fig. 6e) and flex ( $r=-0.53$ ,  $N=17$ ,  
276  $P=0.02$ ) (Fig. 6f) as the relative SL of the intruder increased.

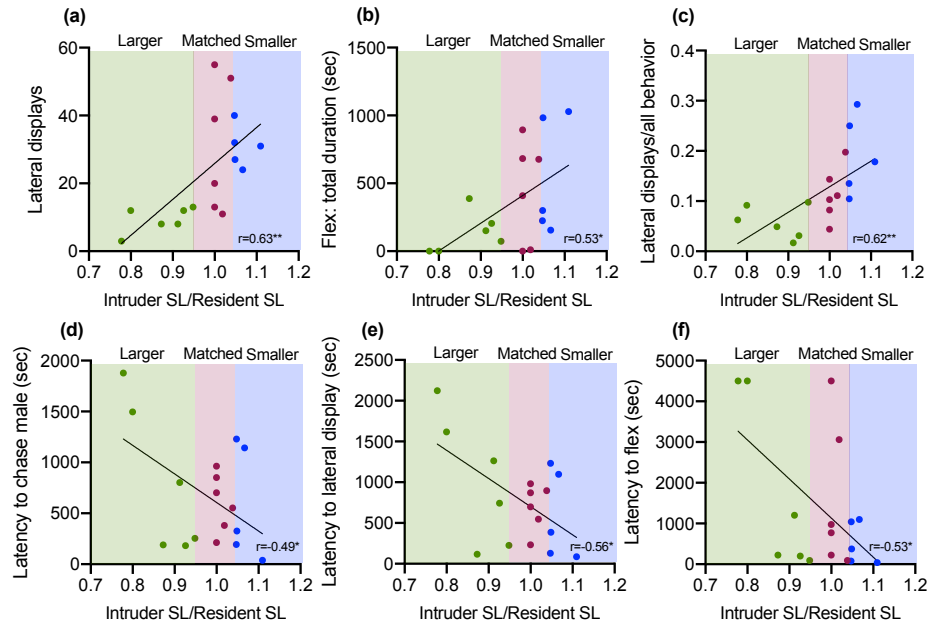

277

278 **Figure 6. Correlations between relative standard length (SL) and behavior.** Correlation  
279 analyses showed significant relationships between relative SL and several behavioral traits. (a)  
280 Larger ratios of intruder SL over resident SL were associated with more lateral displays  
281 performed by the resident. (b) Larger intruder/resident SL ratios were also associated with more  
282 time flexing by the resident male. (c) A larger proportion of behaviors performed were lateral  
283 displays when the intruder/resident SL ratio was larger. Residents took a shorter latency to (d)  
284 chase males, (e) perform lateral displays, and (f) flex when the intruder/resident SL ratio was  
285 larger. Regions of each graph shaded in green, red, or blue correspond to the different ranges  
286 of intruder/resident SL ratios on the x-axis that indicate the categorized groupings written on top  
287 of each graph (Larger, Matched, or Smaller). Pearson's  $r$  values are shown in the bottom right of  
288 each correlation graph. Asterisks indicate a significant correlation. \*\* $P < 0.01$ ; \* $P < 0.05$ .  
289

290

291 *Group-level comparisons suggest residents use a different behavioral strategy depending on*

292 *intruder length*

293

294 We then compared resident behavior as a function of the group-level categories. There  
295 were no effects of group on physical forms of aggression (bites and chases), flexes or pot  
296 entries ( $H_{17} \geq 4.4$ ,  $P \geq 0.12$ ) (Fig. 7a). There was a significant effect of group on the performance  
297 of lateral displays by the resident ( $H_{17} = 8.9$ ,  $P = 0.005$ ); both the Matched and the Smaller fish  
298 directed significantly more lateral displays at the intruder compared to the Larger fish (Fig. 7b).  
299 A significant effect of group was observed on the proportion of behaviors that were lateral  
300 displays ( $H_{17} = 9.3$ ,  $P = 0.003$ ) (Fig. 7c). There were no effects of group on the latency to perform  
301 any specific behaviors ( $H_{17} \geq 1.4$ ,  $P \geq 0.52$ ).

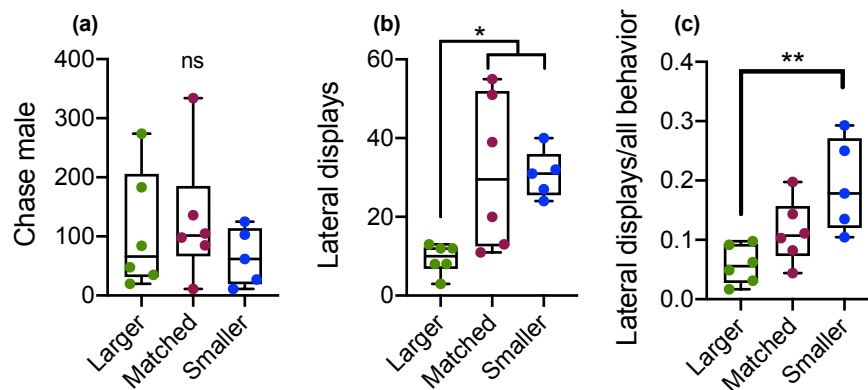

302

303 **Figure 7. Effects of relative-size group on aggressive behavior.** (a) There were no effects of  
304 group on chase male, but Matched and Smaller males performed (b) more lateral displays and  
305 (c) a larger proportion of the behaviors performed by the Smaller males were lateral displays.  
306 Each circle represents an individual fish. Top and bottom whiskers represent maximum and  
307 minimum, respectively; top and lower boxes represent third and first quartiles, respectively; line  
308 within box represents the median. \*\* $P < 0.01$ ; \* $P < 0.05$ .

309

310

311 *No effects of gonadosomatic index or other physiological factors on resident behavior*

312

313 No significant correlations were found between resident GSI and resident behaviors ( $r \geq$ -  
314 0.37,  $N = 17$ ,  $P \geq 0.13$ ). We also did not observe a significant effect of group on GSI ( $H_{17} = 1.3$ ,  
315  $P = 0.53$ ) (Fig. 8a). However, as expected, residents had significantly larger GSI than intruders  
316 (i.e., suppressed fish) ( $U = 53$ ,  $n_1 = 18$ ,  $n_2 = 17$ ,  $P = 0.0006$ ) (Fig. 8b), suggesting that residents had

317 reached dominant social status after being placed in dominance-inducing tanks and intruders  
318 were socially suppressed.

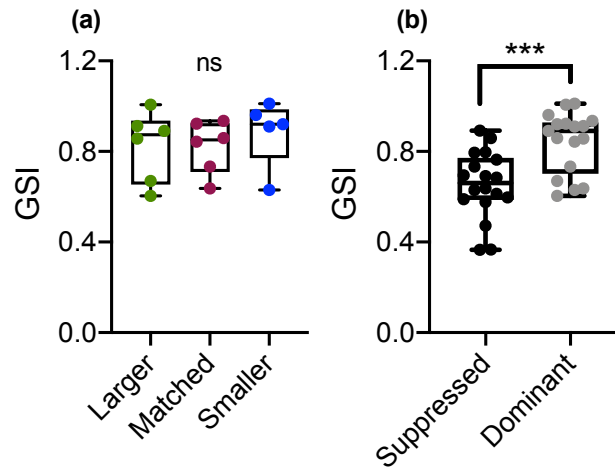

319

320 **Figure 8. Effects of relative-size group and social status on gonadosomatic index (GSI).**  
321 (a) Groups did not differ in GSI. (b) Socially suppressed males had significantly smaller GSI  
322 than dominant males. Each circle represents an individual fish. Top and bottom whiskers  
323 represent maximum and minimum, respectively; top and lower boxes represent third and first  
324 quartiles, respectively; line within box represents the median. ns=non-significant. \*\*\* $P < 0.0001$ .  
325

326 We also assessed whether certain physiological traits in residents other than the relative  
327 SL of the intruder may have influenced our behavioral findings. Overall, while significant  
328 physiological effects were observed, they were completely unrelated to our behavioral findings.  
329 For instance, there was an effect of group on SL ( $H_{17}=11.28$ ,  $P=0.0003$ ) and body mass (BM)  
330 ( $H_{17}=11.58$ ,  $P=0.0002$ ), where the Smaller group had significantly larger SL and BM than the  
331 Matched group (Fig. S1a-b). Fish from the Smaller group also faced intruders that were  
332 significantly larger in terms of SL ( $H_{17}=11.39$ ,  $P=0.0003$ ) and BM ( $H_{17}=11.31$ ,  $P=0.0003$ )  
333 compared to the Larger group (Fig. S1c-d). Finally, the Smaller group had larger testes than the  
334 matched group ( $H_{17}=6.9$ ,  $P=0.02$ ) (Fig. S1e). This overall pattern of differences does not  
335 systematically relate to our pattern of behavioral findings (see Fig. 4-8), suggesting that our  
336 behavioral differences are specifically related to the effects of the intruder's relative SL.  
337

## 338 Discussion

339

340 We have characterized a behavioral logic underlying aggression in resident dominant  
341 males in *A. burtoni*. Specifically, when resident dominant males are exposed to an intruder who  
342 is matched or larger in relative SL, they use a behavioral strategy that emphasizes non-physical  
343 aggression. On the other hand, physical aggression in resident dominant males does not vary  
344 as a function of differences in the relative SL of the intruder. Below we describe how our results  
345 contribute to our understanding of social hierarchies in *A. burtoni*.

346

347 In *A. burtoni*, size is a critical factor in determining social rank (Fernald & Maruska, 2012;  
348 Fernald, 2012). This fact is so well-established that studies aiming to include *A. burtoni* males of  
349 lower and higher ranks can reliably induce such ranks by housing fish with others that are larger  
350 or smaller for approximately two weeks or more (For examples, see Alward, Hilliard, York, &  
351 Fernald, 2019; Burmeister, Jarvis, & Fernald, 2005; Maruska, Becker, Neboori, & Fernald, 2013;  
352 Maruska & Fernald, 2010). Nevertheless, relative size in *A. burtoni* has typically been used only  
353 in this way. One reason small differences in relative size were not considered to be behaviorally  
354 relevant based on previous findings is the lack of consistency in behavioral quantification and  
355 analysis itself. For instance, different aggressive behaviors in *A. burtoni* have at times been  
356 represented by a single metric, in which both physical and non-physical aggression were treated  
357 as one measure called total aggression (for example, see Desjardins & Fernald, 2010).  
358 However, recent studies have shown that physical and non-physical aggression are  
359 uncorrelated in *A. burtoni*, suggesting that these aggressive behaviors function differently during  
360 social interactions. For instance, Loveland and colleagues showed a lack of correlation between  
361 lateral displays and border fights, a type of physical aggression (Loveland, Uy, Maruska,  
362 Carpenter, & Fernald, 2014). Additionally, a time-course study showed a robust decrease in the  
363 performance of lateral displays from morning to afternoon, without a change in the performance



364 of border fights during the same time period (Alward et al., 2019). This finding provides further  
365 evidence that physical and non-physical aggression are dissociable in *A. burtoni*. By focusing on  
366 individual types of aggressive behavior we were able to detect fine-grained differences in  
367 behavioral output as a function of subtle differences in SL.

368

369 Our results are in line with what has been observed in other fish species. For instance, in  
370 the convict cichlid *Cichlasoma nigrofasciatum*, lateral displays are performed less when fish  
371 could interact visually before allowed to interact physically, compared to when they could not  
372 see each other before physical interaction (Keeley & Grant, 1993). Notably, physical aggression  
373 did not differ regardless of whether the fish could see each other before being allowed to  
374 physically interact. Thus, as in *A. burtoni*, evidence exists in other fish such as *C. nigrofasciatum*  
375 that non-physical and physical aggression are used differently depending on the social  
376 environment. For *A. burtoni* specifically, lateral displays are used more frequently when SL  
377 asymmetries are smaller, suggesting lateral displays are used to settle conflicts that are difficult  
378 to resolve.

379

380 In angelfish (*Pterophyllum scalare*) larger males competing in a neutral territory always  
381 won contests (Chellappa, Yamamoto, Cacho, & Huntingford, 1999). On the other hand, when a  
382 resident-intruder asymmetry existed the resident always won irrespective of relative intruder  
383 size. Hence, as with *A. burtoni*, relative size influences behavior but residents have an  
384 advantage in resident-intruder contests. Indeed, the prior-residence advantage effect has been  
385 well demonstrated in laboratory and field situations (Alcock, 2009; Mesterton-Gibbons &  
386 Sherratt, 2016). Future studies modifying social experience of both intruders and residents in *A.*  
387 *burtoni* may yield novel insights into the behavioral logic of aggression in *A. burtoni*.

388

389 Our results suggest there is a complex relationship between social experience and  
390 behavioral responses to size differences in *A. burtoni*. Indeed, if it was the case that only size  
391 differences guided behavioral performance, then intruder males that were larger than the  
392 resident should have performed more lateral displays--but this was clearly not the case. These  
393 results suggest a winner and/or loser effect plays a role in guiding social decisions in male *A.*  
394 *burtoni*. In the winner effect, competitors who win contests are more likely to win future contests  
395 than losers (Dugatkin, 1997; Dugatkin & Earley, 2004). Here, socially suppressed males are  
396 likely to be losing contests repeatedly. Furthermore, testosterone, which is higher in dominant  
397 males than non-dominant males (Parikh, Clement, & Fernald, 2006), increases the winner  
398 effect (Oliveira, Silva, & Canário, 2009). Moreover, androgen receptor activation is required for  
399 social dominance (Alward et al., 2019). Based on the above, we hypothesize that testosterone  
400 may modulate cost thresholds in *A. burtoni* males. Future work manipulating testosterone  
401 signaling pharmacologically or genetically will be fundamental in determining the functional  
402 relationship between testosterone, winner/loser effects, and cost thresholds in *A. burtoni*.

403

#### 404 **Conclusion**

405

406 We discovered in a highly social cichlid fish that relative size differences between a  
407 dominant resident and a non-dominant intruder male affects social decisions made by the  
408 resident male. Our findings lay the foundation for future work on the different social and  
409 biological factors that may affect behavioral strategies in *A. burtoni* and add to the existing work  
410 on models of aggression in social fish species.

411

#### 412 **Acknowledgements**

413

414 We thank Christopher Skalnik for helpful feedback assisting in the experimental design and  
415 Anne Fernald and Andrew Hoadley for providing feedback on an earlier version of the  
416 manuscript.

417

418 **Funding:** This work was supported by an Arnold O. Beckman Fellowship to B.A.A., a University  
419 of Houston-National Research University Fund (NRUF: R0503962) to B.A.A., and an NIH  
420 NS034950, NIH MH101373, and NIH MH 096220 to R.D.F.

421

## 422 **References**

423

424 Alcazar, R. M., Hilliard, A. T., Becker, L., Bernaba, M., & Fernald, R. D. (2014). Brains over  
425 brawn: Experience overcomes a size disadvantage in fish social hierarchies. *Journal of*  
426 *Experimental Biology*, 217(9), 1462–1466. <https://doi.org/10.1242/jeb.097527>

427 Alcock, J. (2009). *Animal behavior: An evolutionary approach*. Sinauer Associates.

428 Alward, B. A., Hilliard, A. T., York, R. A., & Fernald, R. D. (2019). Hormonal regulation of social  
429 ascent and temporal patterns of behavior in an African cichlid. *Hormones and Behavior*,  
430 107(December 2018), 83–95. <https://doi.org/10.1016/j.yhbeh.2018.12.010>

431 Burmeister, S. S., Jarvis, E. D., & Fernald, R. D. (2005). Rapid behavioral and genomic  
432 responses to social opportunity. *PLoS ONE*, 3(11), 1–9.  
433 <https://doi.org/10.1371/journal.pbio.0030363>

434 Chellappa, S., Yamamoto, M. E., Cacho, M. S. R. F., & Huntingford, F. A. (1999). Prior  
435 residence, body size and the dynamics of territorial disputes between male freshwater  
436 angelfish. *Journal of Fish Biology*, 55, 1163–1170.

437 Desjardins, J. K., & Fernald, R. D. (2010). What do fish make of mirror images? *Biology Letters*,  
438 6(6), 744–747. <https://doi.org/10.1098/rsbl.2010.0247>

439 Dugatkin, L. A. (1997). Winner and loser effects and the structure of dominance hierarchies.  
440 *Behavioral Ecology*, 8(6), 583–587. <https://doi.org/10.1093/beheco/8.6.583>

441 Dugatkin, L. A., & Earley, R. L. (2004). Individual recognition, dominance hierarchies and winner  
442 and loser effects. *Proceedings of the Royal Society B: Biological Sciences*, 271(1547),  
443 1537–1540. <https://doi.org/10.1098/rspb.2004.2777>

444 Fernald, R. D., & Maruska, K. P. (2012). Social information changes the brain. *Proceedings of*  
445 *the National Academy of Sciences*, 109(Supplement\_2), 17194–17199.  
446 <https://doi.org/10.1073/pnas.1202552109>

447 Fernald, R.D. (2012). Social control of the brain. *Annual Review of Neuroscience*, 35, 135–151.

448 Fernald, Russell D., & Hirata, N. R. (1977). Field study of *Haplochromis burtoni*: Quantitative  
449 behavioural observations. *Animal Behaviour*, 25, 964–975. [https://doi.org/10.1016/0003-](https://doi.org/10.1016/0003-3472(77)90048-3)  
450 [3472\(77\)90048-3](https://doi.org/10.1016/0003-3472(77)90048-3)

451 Holekamp, K. E., & Strauss, E. D. (2016). Aggression and dominance: an interdisciplinary  
452 overview. *Current Opinion in Behavioral Sciences*, 12, 44–51.  
453 <https://doi.org/10.1016/j.cobeha.2016.08.005>

454 Keeley, E. R., & Grant, J. W. A. (1993). Visual information, resource value, and sequential  
455 assessment in convict cichlid (*Cichlasoma nigrofasciatum*) contests. *Behavioral Ecology*,  
456 4(4), 345–349. <https://doi.org/10.1093/beheco/4.4.345>

457 Loveland, J. L., Uy, N., Maruska, K. P., Carpenter, R. E., & Fernald, R. D. (2014). Social status  
458 differences regulate the serotonergic system of a cichlid fish, *Astatotilapia burtoni*. *Journal*  
459 *of Experimental Biology*, 217(15), 2680–2690. <https://doi.org/10.1242/jeb.100685>

460 Maruska, K. P., Becker, L., Neboori, A., & Fernald, R. D. (2013). Social descent with territory  
461 loss causes rapid behavioral, endocrine and transcriptional changes in the brain. *Journal of*  
462 *Experimental Biology*, 216(19), 3656–3666. <https://doi.org/10.1242/jeb.088617>

463 Maruska, Karen P., & Fernald, R. D. (2010). Behavioral and physiological plasticity: Rapid  
464 changes during social ascent in an African cichlid fish. *Hormones and Behavior*, 58(2),  
465 230–240. <https://doi.org/10.1016/j.yhbeh.2010.03.011>

466 Maynard Smith, J., & Harper, D. G. C. (1988). The evolution of aggression: can selection  
467 generate variability? *Philosophical Transactions of the Royal Society of London. Series B,*  
468 *Biological Sciences*, 319, 557–570.

- 469 Mesterton-Gibbons, M., & Sherratt, T. N. (2016). How residency duration affects the outcome of  
470 a territorial contest: Complementary game-theoretic models. *Journal of Theoretical Biology*,  
471 394, 137–148. <https://doi.org/10.1016/j.jtbi.2016.01.016>
- 472 Oliveira, R. F., Silva, A., & Canário, A. V. M. (2009). Why do winners keep winning? Androgen  
473 mediation of winner but not loser effects in cichlid fish. *Proceedings of the Royal Society of  
474 London B*, 276(March), 2249–2256. <https://doi.org/10.1098/rspb.2009.0132>
- 475 Parikh, V. N., Clement, T. S., & Fernald, R. D. (2006). Androgen level and male social status in  
476 the African cichlid, *Astatotilapia burtoni*. *Behavioural Brain Research*, 166(2), 291–295.  
477 <https://doi.org/10.1016/j.bbr.2005.07.011>
- 478 Reddon, A. R., Voisin, M. R., Menon, N., Marsh-Rollo, S. E., Wong, M. Y. L., & Balshine, S.  
479 (2011). Rules of engagement for resource contests in a social fish. *Animal Behaviour*,  
480 82(1), 93–99. <https://doi.org/10.1016/j.anbehav.2011.04.003>
- 481 Solomon-Lane, T. K., & Hofmann, H. A. (2019). Early-life social environment alters juvenile  
482 behavior and neuroendocrine function in a highly social cichlid fish. *Hormones and  
483 Behavior*, 115(April), 104552. <https://doi.org/10.1016/j.yhbeh.2019.06.016>
- 484 Taborsky, M. (1984). Broodcare helpers in the cichlid fish *Lamprologus brichardi*: Their costs  
485 and benefits. *Animal Behaviour*, 32, 1236–1252.
- 486 Taborsky, M. (1985). Breeder-Helper Conflict in a Cichlid Fish With Broodcare Helpers: an  
487 Experimental Analysis. *Behaviour*, 95, 45–75.
- 488 van Staaden, M. J., Searcy, W. A., & Hanlon, R. T. (2011). Signaling aggression. In *Advances in  
489 Genetics* (1st ed., Vol. 75). <https://doi.org/10.1016/B978-0-12-380858-5.00008-3>
- 490  
491  
492  
493  
494  
495  
496  
497  
498  
499  
500  
501  
502  
503  
504  
505  
506  
507  
508  
509  
510  
511  
512  
513  
514  
515  
516  
517  
518  
519

520 **Supplementary Figure and Legend**  
521

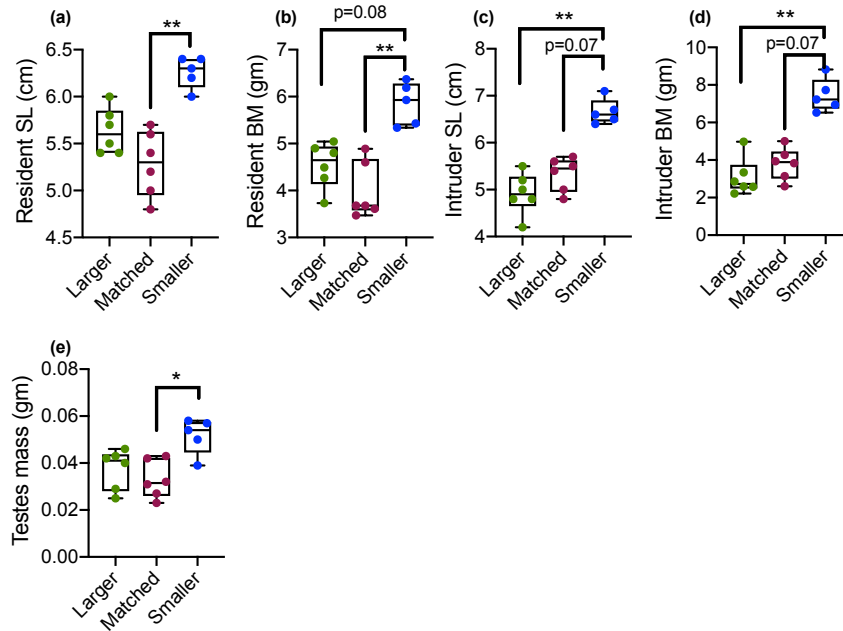

522 **Figure S1. Effects of group on body size measures and testes mass.** (a-e) For all measures  
523 shown the Larger and Matched group did not differ. The Smaller group males were larger than  
524 the Matched group for (a) SL and (b) BM, and (e) testes mass. (b) There was a statistical trend  
525 for the Smaller group fish to have larger BM than the Larger group fish. (c-d) Smaller group fish  
526 were exposed to larger intruders than the Larger and Matched group fish, but this was only a  
527 statistical trend for the latter group. Each circle represents an individual fish. Top and bottom  
528 whiskers represent maximum and minimum, respectively; top and lower boxes represent third  
529 and first quartiles, respectively; line within box represents the median. \*\* $P < 0.01$ ; \* $P < 0.05$ .  
530  
531
